# Supplementary material for: Complementary Roles of Two DNA Protection Proteins from Deinococcus geothermalis
Source: MDPI journal article supplement (doi:10.3390/ijms24010469), 2022-12-27

## List

|                                     |   |
|-------------------------------------|---|
| Supporting Information.R1.docx..... | 1 |
| Supporting data.R1.....             | 3 |

## Supporting information

**Table S1.** List of primers to construct *D. geothermalis* mutant strains and recombinant plasmids for Dps protein expression.

| Primer                                             | Sequence (5'→3')                         | RE site      |
|----------------------------------------------------|------------------------------------------|--------------|
| Construction for $\Delta dgeo\_0281$ mutant strain |                                          |              |
| 0281_LF_ <i>KpnI</i>                               | 5' AAGGTACCTTCCAGGGGTTCACTT 3'           | <i>KpnI</i>  |
| 0281_LR_ <i>SalI</i>                               | 5' AAGTCGACCGACTTTCTTCACGCT 3'           | <i>SalI</i>  |
| 0281_RF_ <i>XbaI</i>                               | 5' AATCTAGAGAATCAAGCTGCGTCCT 3'          | <i>XbaI</i>  |
| 0281_RR_ <i>PstI</i>                               | 5' AACTGCAGCATTGGAAGCGGCATT 3'           | <i>PstI</i>  |
| Construction of pCS19_ <i>dgeo_0257</i>            |                                          |              |
| pCS19_0257F                                        | 5' AACCATGGCCAAGCGCAGCAAGGTGTT 3'        | <i>NcoI</i>  |
| pCS19_0257R                                        | 5' AAAGATCTTTGGGACGCGAGGCGTTCCT 3'       | <i>BglII</i> |
| pCS19_ <i>dgeo0257</i> _SDM_F*                     | 5' AGAAATTAACCATGACCAAGCGCAGCAAG 3'      |              |
| pCS19_ <i>dgeo0257</i> _SDM_R*                     | 5' CTTGCTGCGCTTGGTCATGGTTAATTTCT 3'      |              |
| Construction of pCS19_ <i>dgeo_0281</i>            |                                          |              |
| pCS19_0281F                                        | 5' AACCATGGCAAGAGCCACCAAATCGGCG 3'       | <i>NcoI</i>  |
| pCS19_0281R                                        | 5' AAGGATCCGTTTCATCCGGTCATCGTCCAAGATC 3' | <i>BamHI</i> |
| pCS19_ <i>dgeo0281</i> _SDM_F*                     | 5' GAGAAATTAACCATGACAAGAGCCACCAAA 3'     |              |
| pCS19_ <i>dgeo0281</i> _SDM_R*                     | 5' ATTTGGTGGCTCTTGTCATGGTTAATTTCTC 3'    |              |

\* Site-directed mutagenesis (SDM) for second amino acid residue was performed because when we applied *NcoI* for cloning, the first nucleotide of second amino acid was changed to 'G'. The bold indicates original nucleotide for substitution.

## Figure legends

**Figure S1.** A. Protein profiles from total lysates included both Dgeo\_0257 and Dgeo\_0281 (DgDps1) by induced different concentrations of IPTG. B. Protein profiles from one step purification of Ni-affinity chromatography both Dgeo\_0257 and Dgeo\_0281 (DgDps1). Lanes: M. size markers; p, pass through; w, wash; e, elution; conc & nc, concentrated by Viva spin and non-concentrated, respectively; c, control by the purified Dgeo\_0257 protein.

**Figure S2.** Gel filtration of Dgeo\_0257 and Dgeo\_0281 with/without iron ions. Calibration of gel filtration with size markers marked with arrows: 1, 440 kDa, ferritin; 2, 75 kDa, conalbumin; 3, 43 kDa, ovalbumin; 4, 29kDa, anhydrase from erythrocytes in inner box. Gel filtration profiles of Dgeo\_0257 (A) and Dgeo\_0281 (B) with protein only, add Fe (II) 1 mM, and add Fe (III) 1 mM conditions.

**Figure S3.** Various metals effect on EMSA of DgDps1 (Dgeo\_0281) and DgDps3 (Dgeo\_0257). A, lead; B, cobalt; C, copper; D, caesium; E, chromate.

**Figure S4.** A, Comparison of growth pattern among wild-type,  $\Delta dgeo\_0257$ , and  $\Delta dgeo\_0281$  mutants on TGY medium. B, Comparison of growth pattern among complementary strains when chloramphenicol of 3  $\mu\text{g/mL}$  was present. C, Viability test by hydrogen peroxide treatment of 80, 100, and 120 mM among wild-type,  $\Delta dgeo\_0257$ ,  $\Delta dgeo\_0281$  mutants and their complementary strains ( $\Delta dgeo\_0257/\text{pRADgro\_}dgeo\_0257$ , and  $\Delta dgeo\_0281/\text{pRADgro\_}dgeo\_0281$ ).

**Figure S5.** qRT-PCR analysis of *dgeo\_0257* and *dgeo\_0281* genes in complementary strains under 50 mM  $\text{H}_2\text{O}_2$  stress conditions. \*\*  $p < 0.01$ .

Figure S1

A

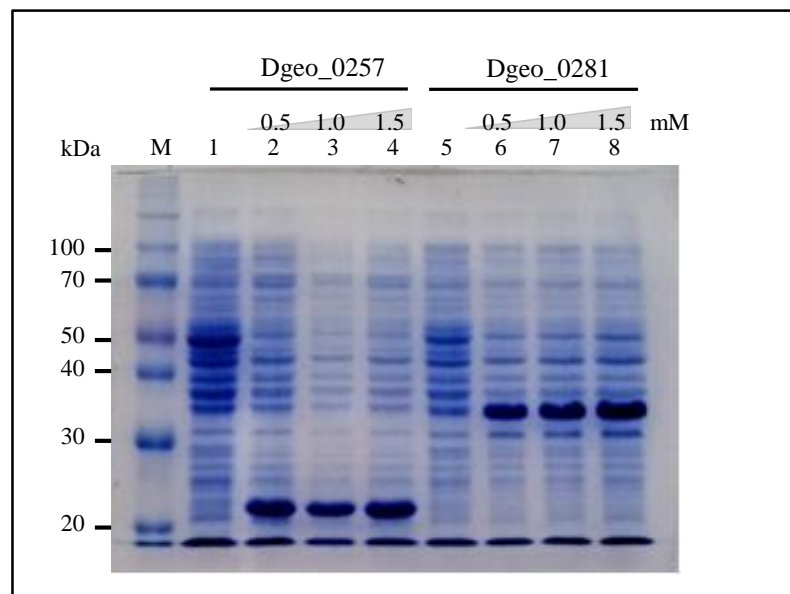

Figure S1

B

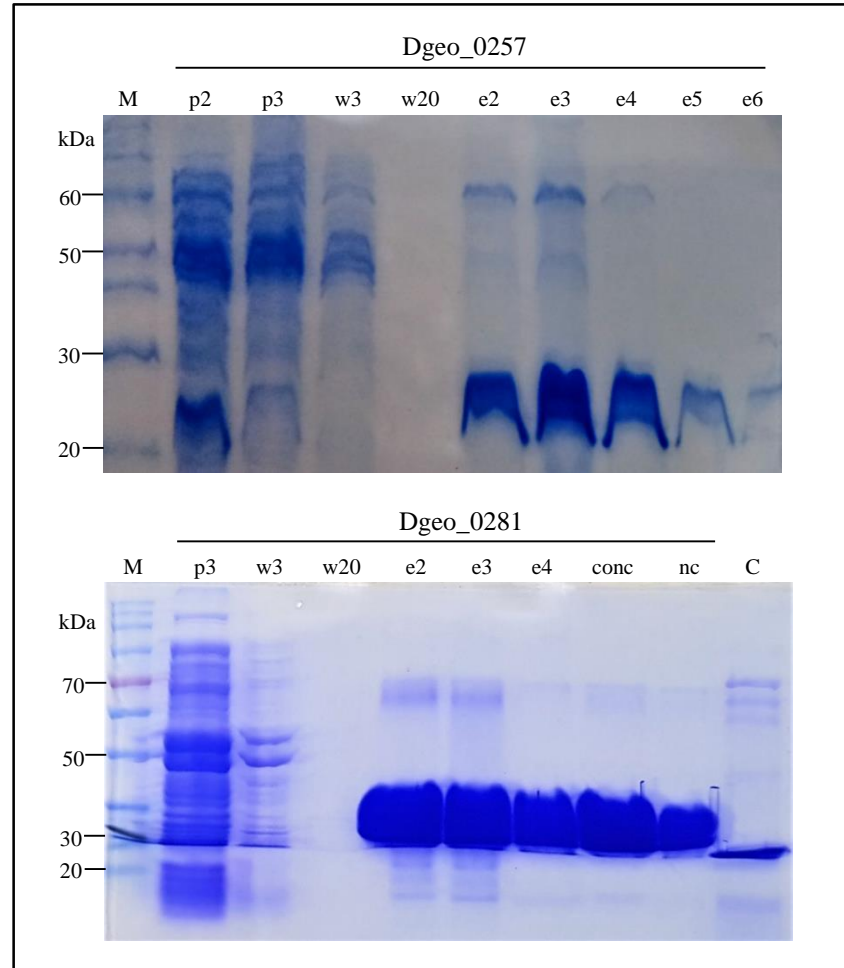

Figure S2

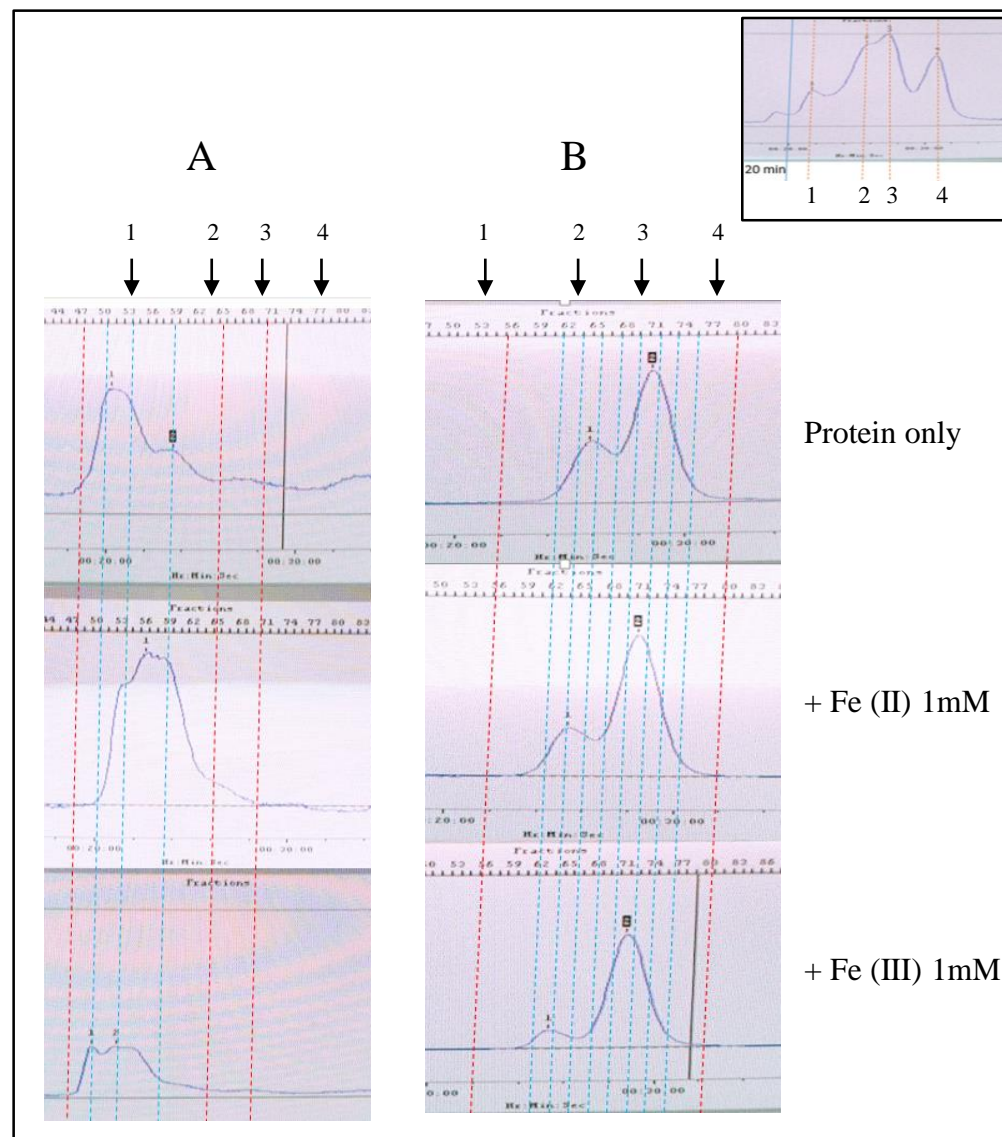

Figure S3

A

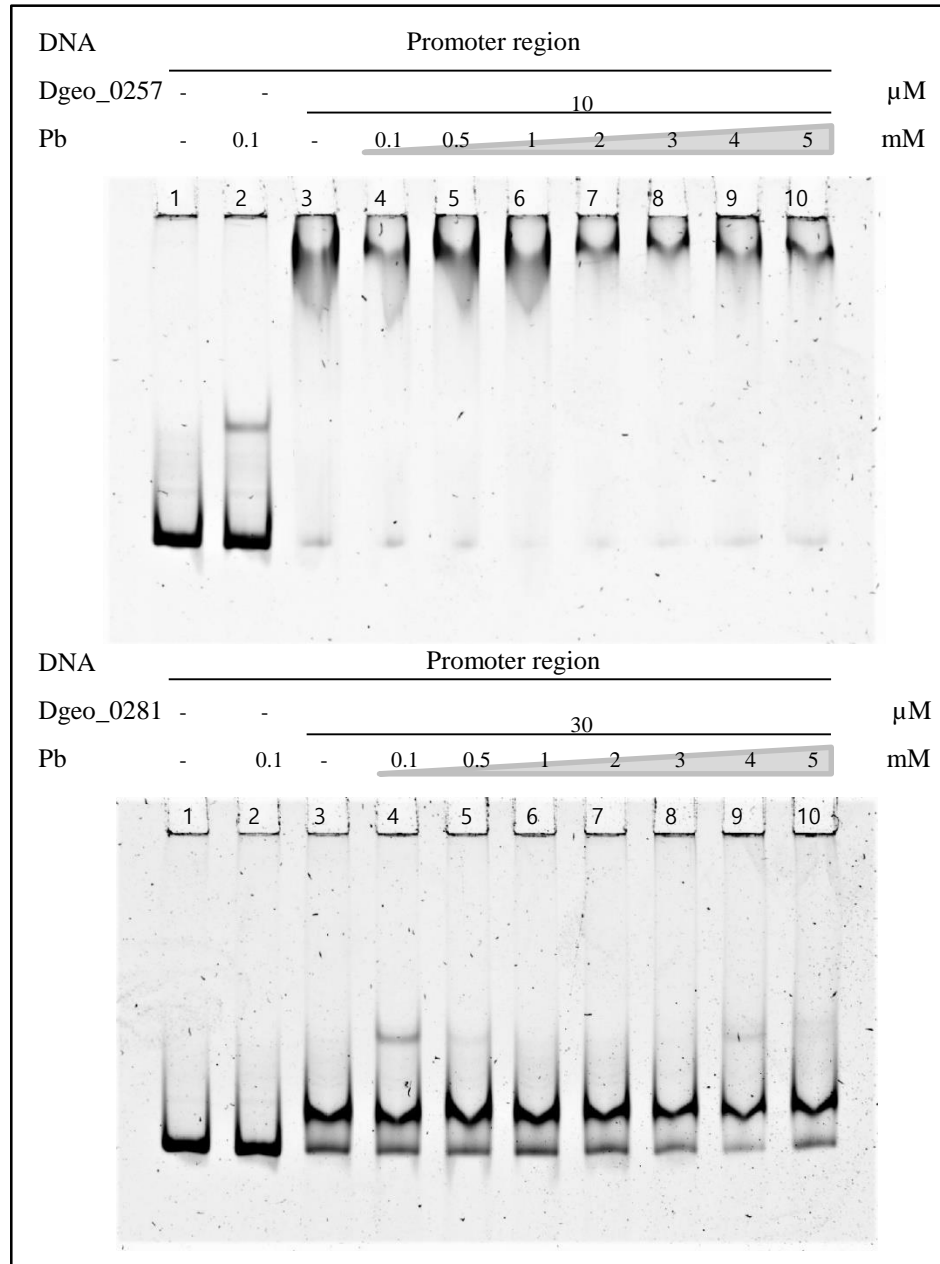

Figure S3 B

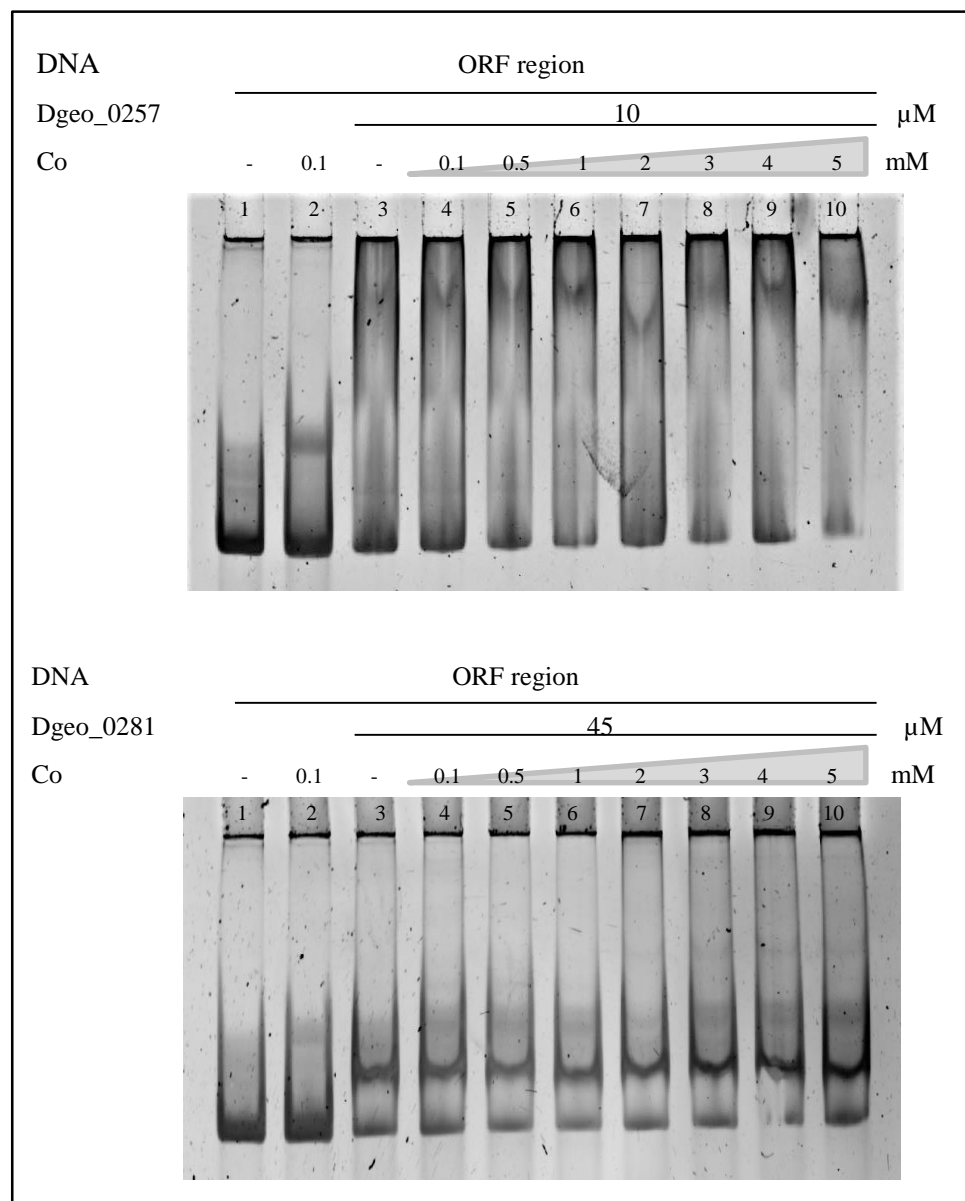



Figure S3 C

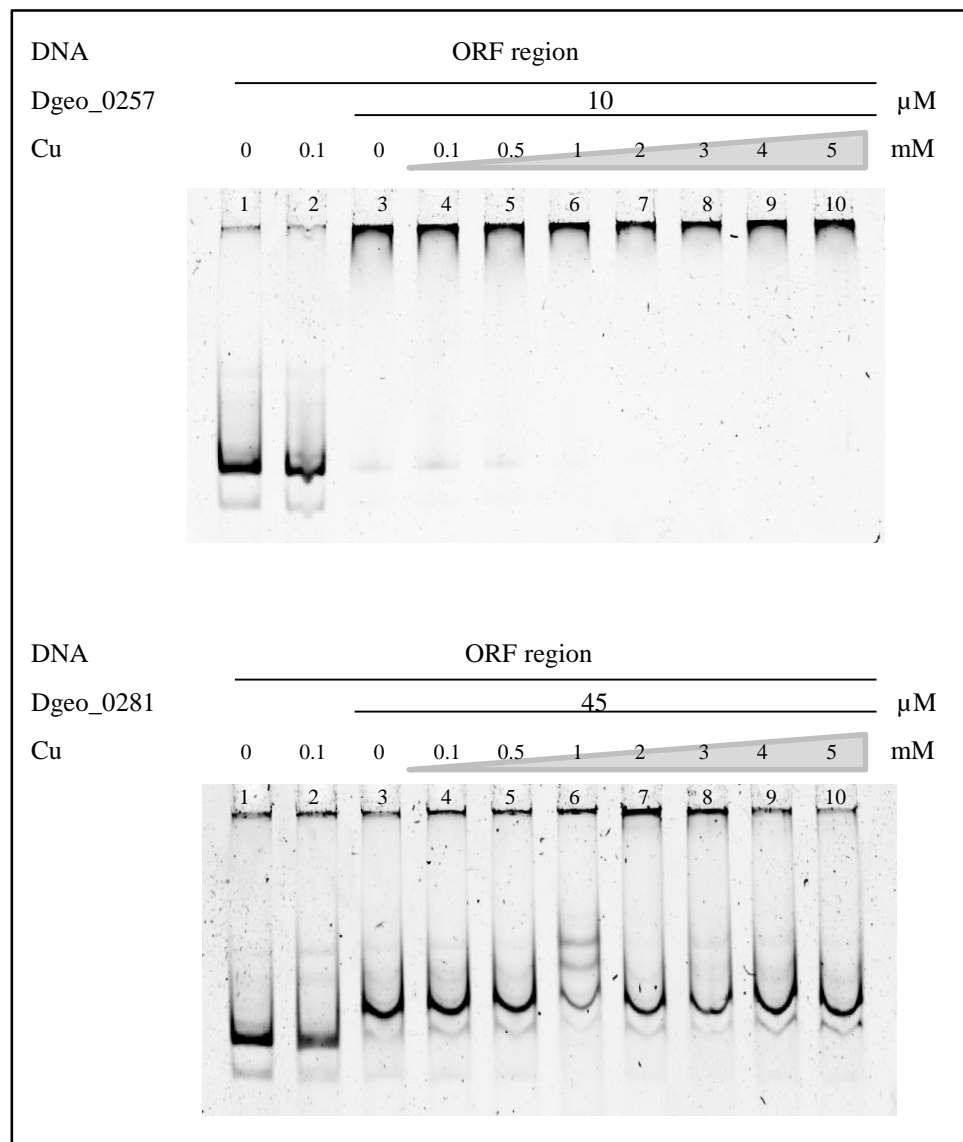

Figure S3 D

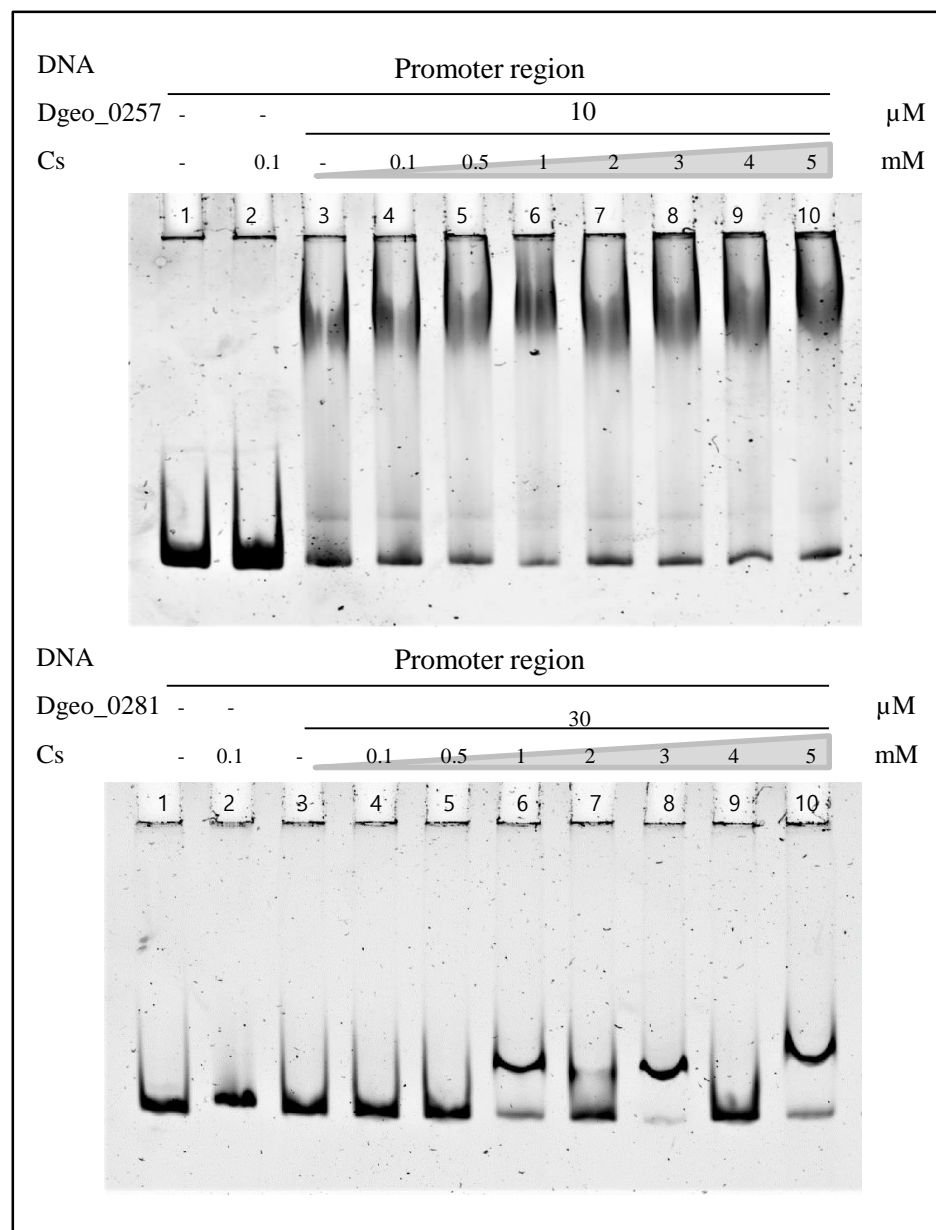

Figure S3 E

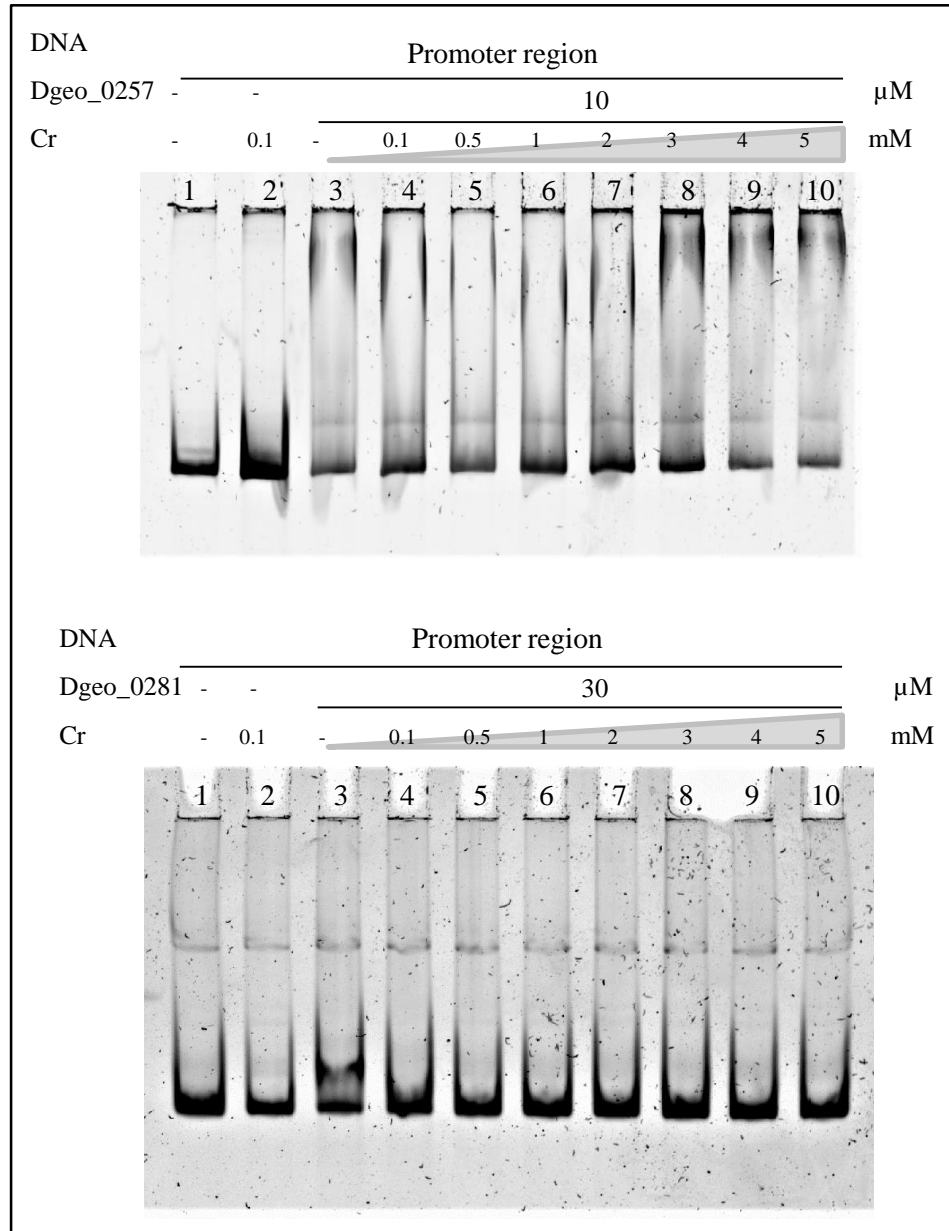

Figure S4

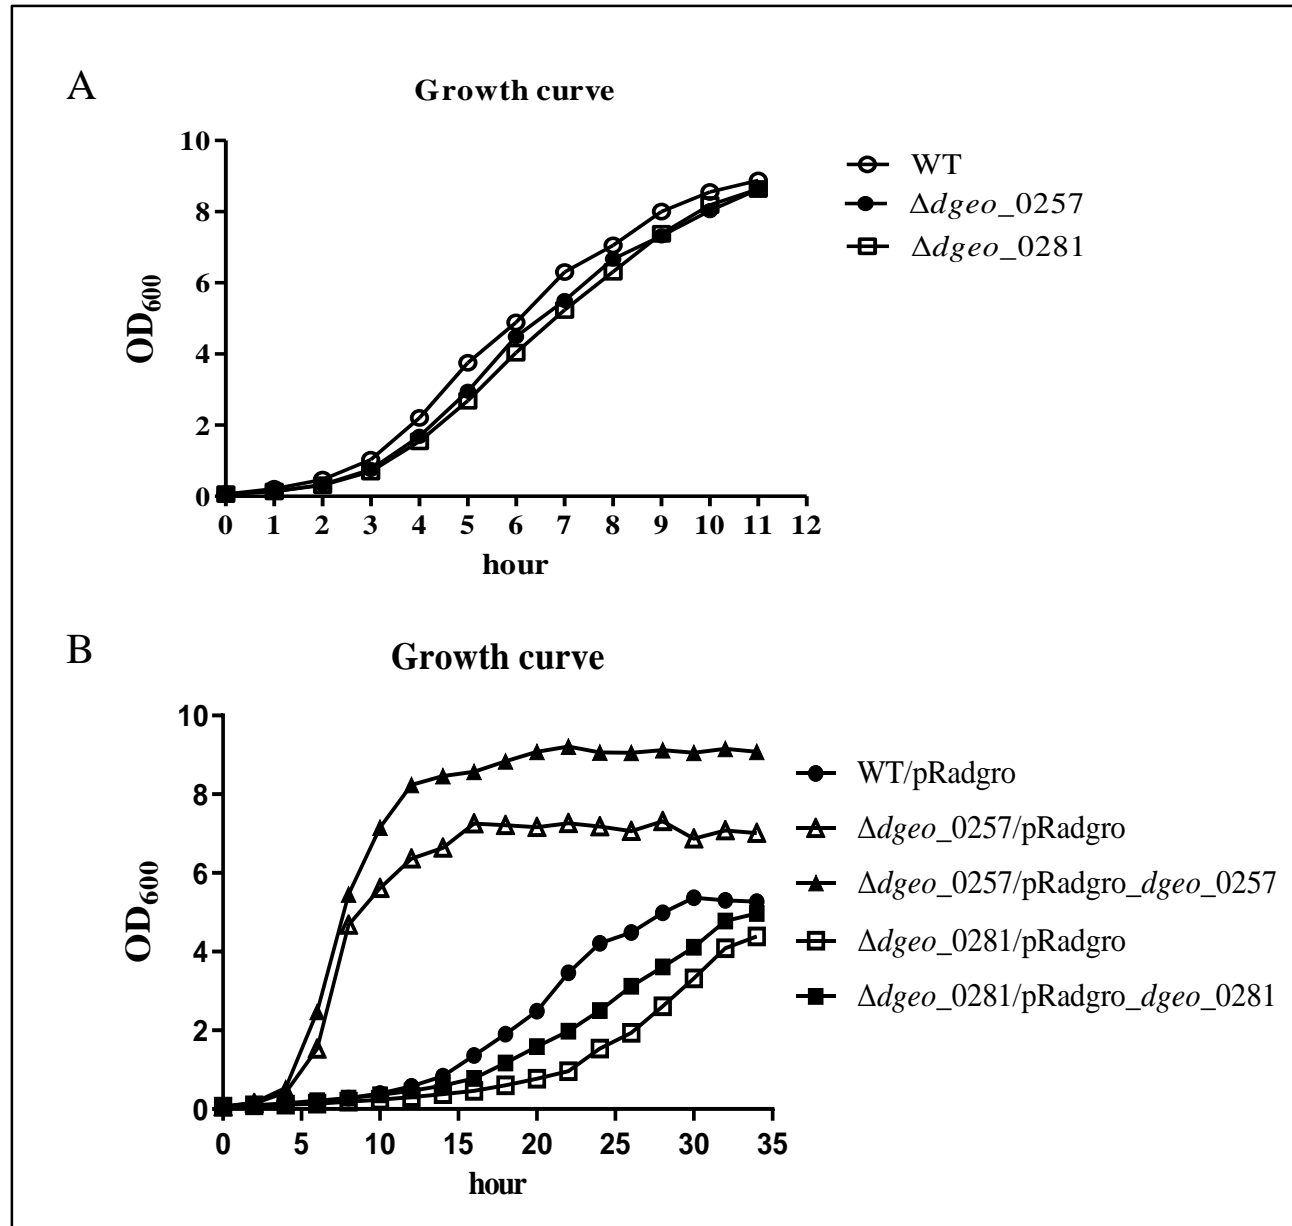

Figure S4

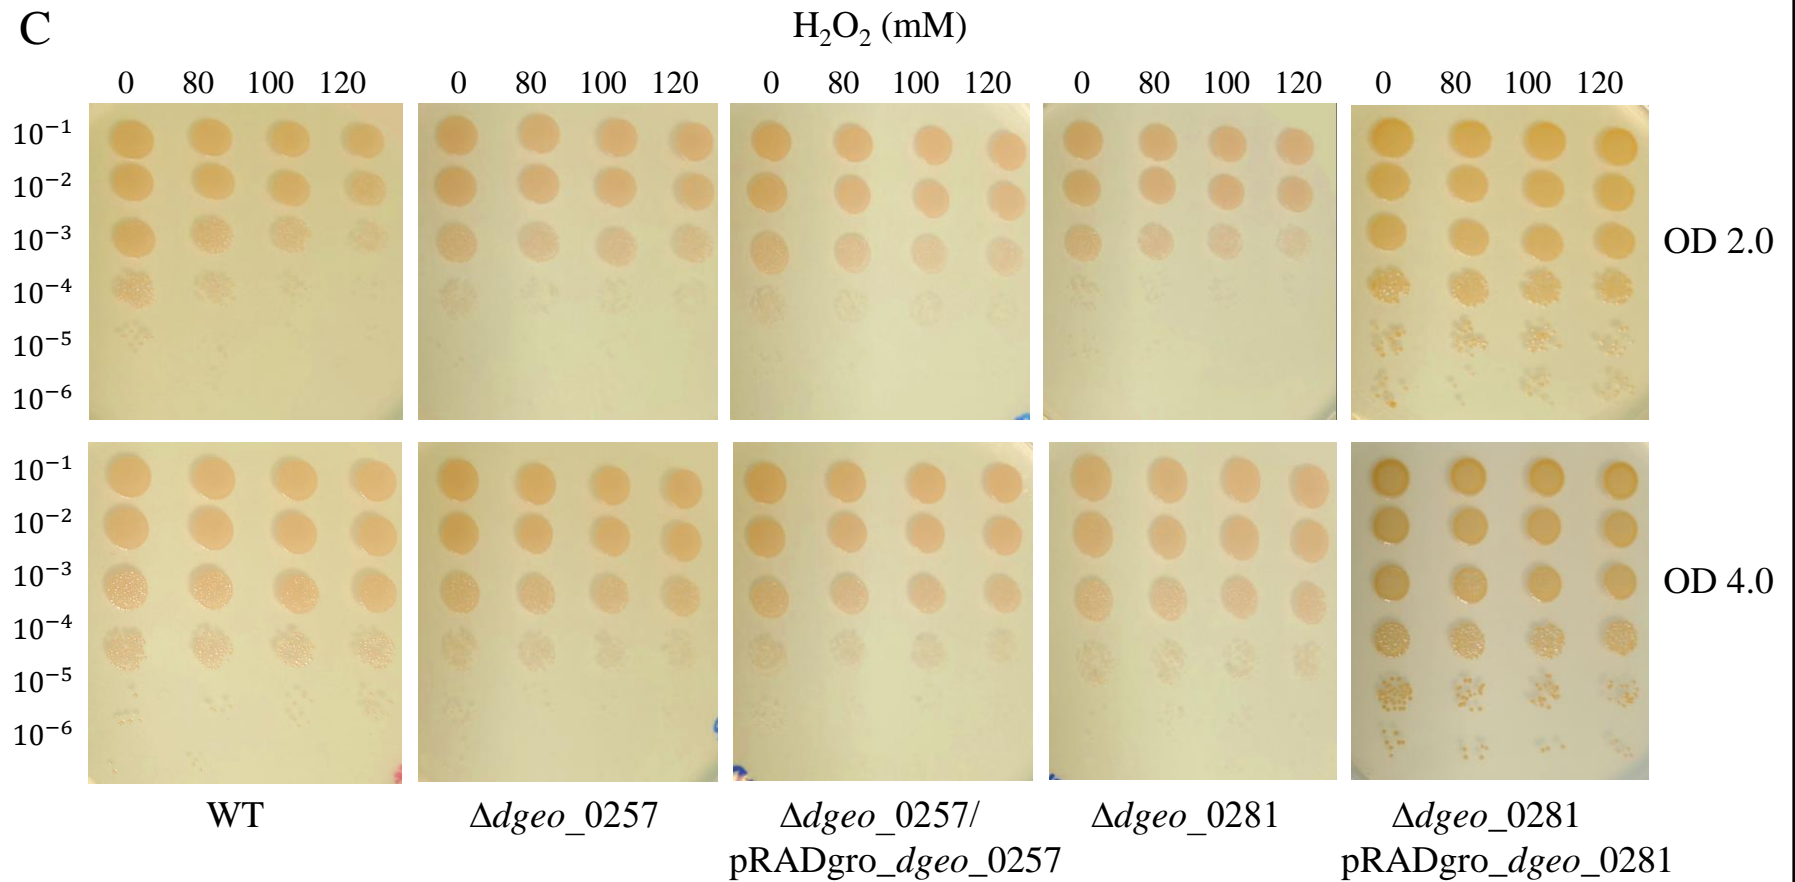

Figure S5

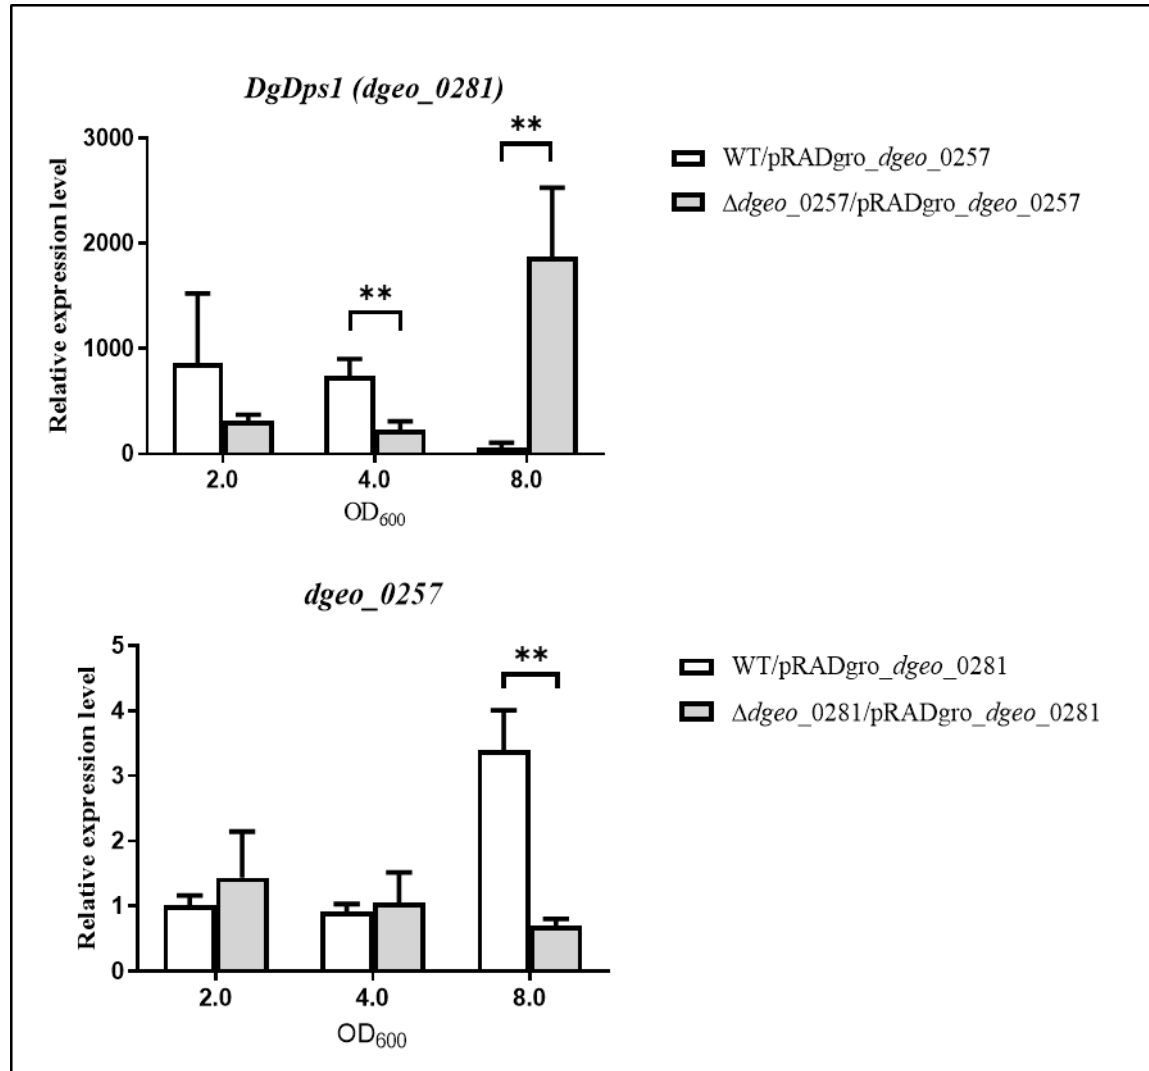

Supplement: s1 [file s1]
